# Supplementary material for: Alkaline earth atom doping-induced changes in the electronic and magnetic properties of graphene: a density functional theory study
Source: Royal Society of Chemistry journal article supplement (doi:10.1039/d0ra08115a), 2021-01-01
Supplement: d0ra08115a2.pdf [file d0ra08115a2.pdf]

## Electronic Supplementary Information: Verificatory results at 1200 eV cutoff energy

### List of Figures

|     |                                                                                                              |    |
|-----|--------------------------------------------------------------------------------------------------------------|----|
| H1  | Bader charge analysis for AE-graphenes at 1200 eV energy cutoff . . . . .                                    | 3  |
| H2  | Bader charge analysis and structure for Be-graphene at 1200 eV energy cutoff . . . . .                       | 4  |
| H3  | Bader charge analysis and structure for Mg-graphene at 1200 eV energy cutoff . . . . .                       | 5  |
| H4  | Bader charge analysis and structure for Ca-graphene at 1200 eV energy cutoff . . . . .                       | 6  |
| H5  | Bader charge analysis and structure for Sr-graphene at 1200 eV energy cutoff . . . . .                       | 7  |
| H6  | Plane averaged electrostatic potential plots for AE-graphenes at 1200 eV energy cutoff . . . . .             | 8  |
| H7  | Charge difference plots for AE-graphenes at 1200 eV energy cutoff . . . . .                                  | 9  |
| H8  | Supplementary charge difference plots for AE-graphenes at 1200 eV energy cutoff . . . . .                    | 10 |
| H9  | Electron localization function (ELF) plots for AE-graphenes at 1200 eV energy cutoff . . . . .               | 11 |
| H10 | Supplementary electron localization function (ELF) plots for AE-graphenes at 1200 eV energy cutoff . . . . . | 12 |
| H11 | Reduced density gradient (RDG) plots for AE-graphenes at 1200 eV energy cutoff . . . . .                     | 13 |
| H12 | Supplementary reduced density gradient (RDG) plots for AE-graphenes at 1200 eV energy cutoff . . . . .       | 14 |
| H13 | Spin-difference plots for AE-graphenes at 1200 eV energy cutoff. . . . .                                     | 15 |
| H14 | Electronic properties and orbital hybridization for Be-graphene at 1200 eV energy cutoff . . . . .           | 17 |
| H15 | DOS for Be-graphene at 1200 eV energy cutoff. . . . .                                                        | 18 |
| H16 | Electronic properties and orbital hybridization for Mg-graphene at 1200 eV energy cutoff . . . . .           | 19 |
| H17 | DOS and VBM - CBM partial charge densities for Mg-graphene at 1200 eV energy cutoff . . . . .                | 20 |
| H18 | Electronic properties and orbital hybridization for Ca-graphene at 1200 eV energy cutoff . . . . .           | 21 |
| H19 | DOS and VBM - CBM partial charge densities for Ca-graphene at 1200 eV energy cutoff . . . . .                | 22 |
| H20 | Electronic properties and orbital hybridization for Sr-graphene at 1200 eV energy cutoff . . . . .           | 23 |
| H21 | DOS and VBM - CBM partial charge densities for Sr-graphene at 1200 eV energy cutoff . . . . .                | 24 |

### List of Tables

|    |                                                                                            |    |
|----|--------------------------------------------------------------------------------------------|----|
| H1 | Energetics, bond lengths and net charges in AE-graphenes at 1200 eV energy cutoff. . . . . | 2  |
| H2 | Band structure information for AE-Graphenes . . . . .                                      | 16 |

**Table H1** Energetics, bond lengths and net charges in AE-graphenes at 1200 eV energy cutoff.

| System                                        | $E_{bind}$<br>(eV/atom) | $E_{ads}$<br>(eV) | $W_0$<br>(eV) | AE...C<br>distance<br>(Å) | Dopant<br>net charge<br>(e <sup>-</sup> ) |
|-----------------------------------------------|-------------------------|-------------------|---------------|---------------------------|-------------------------------------------|
| Be-graphene<br>(out-of-plane)                 | -7.549                  | -6.294            | 4.841         | 1.627                     | +1.616                                    |
| Be-graphene <sup>1 t</sup><br>(out-of-plane)  | -7.715                  | -                 | -             | 1.62                      | +2.0                                      |
| Be-graphene <sup>2 to</sup><br>(out-of-plane) | -8.699                  | -                 | -             | 1.622                     | +2.0                                      |
| Be-graphene <sup>3 t</sup><br>(out-of-plane)  | -                       | -7.02             | -             | 1.48                      | -0.793                                    |
| Be-graphene <sup>4 t</sup><br>(in-plane)      | -8.86                   | -                 | -             | 1.56                      | +2.0                                      |
| Be-graphene <sup>2 to</sup><br>(in-plane)     | -8.692                  | -                 | -             | 1.568                     | +2.0                                      |
| Mg-graphene                                   | -7.452                  | -1.728            | 3.261         | 2.113                     | +1.332                                    |
| Mg-graphene <sup>3 t</sup>                    | -                       | -2.10             | -             | 2.11                      | +0.751                                    |
| Ca-graphene                                   | -7.496                  | -3.135            | 2.073         | 2.316                     | +1.276                                    |
| Ca-graphene <sup>3 t</sup>                    | -                       | -3.59             | -             | 2.30                      | +1.499                                    |
| Ca-graphene <sup>5 x</sup>                    | -                       | -                 | 3.60          | -                         | -                                         |
| Sr-graphene                                   | -7.485                  | -2.806            | 1.834         | 2.459                     | +1.295                                    |
| Sr-graphene <sup>3 t</sup>                    | -                       | -4.19             | -             | 2.60, 2.48 <sup>w</sup>   | +1.125                                    |
| Graphene                                      | -7.890                  | -15.743           | 4.257         | 1.426                     | -                                         |
| Graphene <sup>5-14 xr</sup>                   | -                       | -                 | 4.2-4.8       | 1.44                      | -                                         |
| Graphene <sup>15-24 tr</sup>                  | -                       | -                 | 4.23-4.66     | 1.42-1.44                 | -                                         |
| Graphene <sup>3t</sup>                        | -                       | -                 | -             | 1.42                      | -                                         |
| Graphene<br>with monovacancy                  | -8.497                  | -                 | -             | -                         | -                                         |

<sup>t</sup> theoretical result

<sup>x</sup> experimental result

<sup>o</sup> authors' previous work

<sup>r</sup> range provided from results by previous work

<sup>w</sup> two values reported since asymmetrical adsorption was predicted<sup>3</sup>

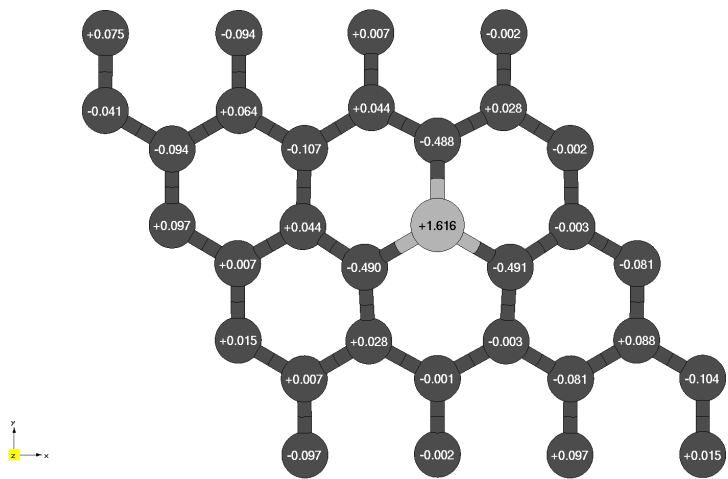

(a) Be-graphene

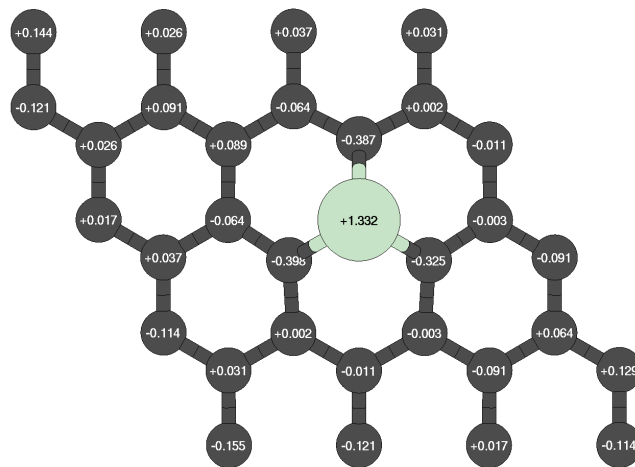

(b) Mg-graphene

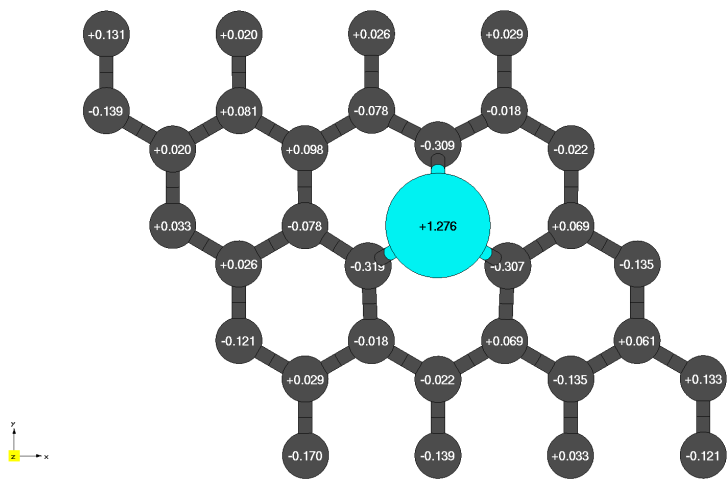

(c) Ca-graphene

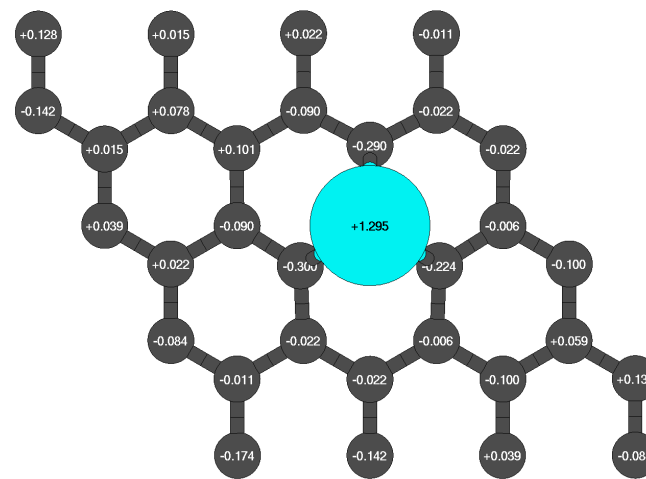

(d) Sr-graphene

**Fig. H1** Bader charge analysis for AE-graphenes at 1200 eV energy cutoff. Net charges for each atom from Bader charge analysis are overlaid on the figure. Grey indicates carbon atoms while the differently colored atom indicates the alkaline earth dopant. Structures for AE-graphenes are detailed in Figs. H2, H3, H4, and H5†.

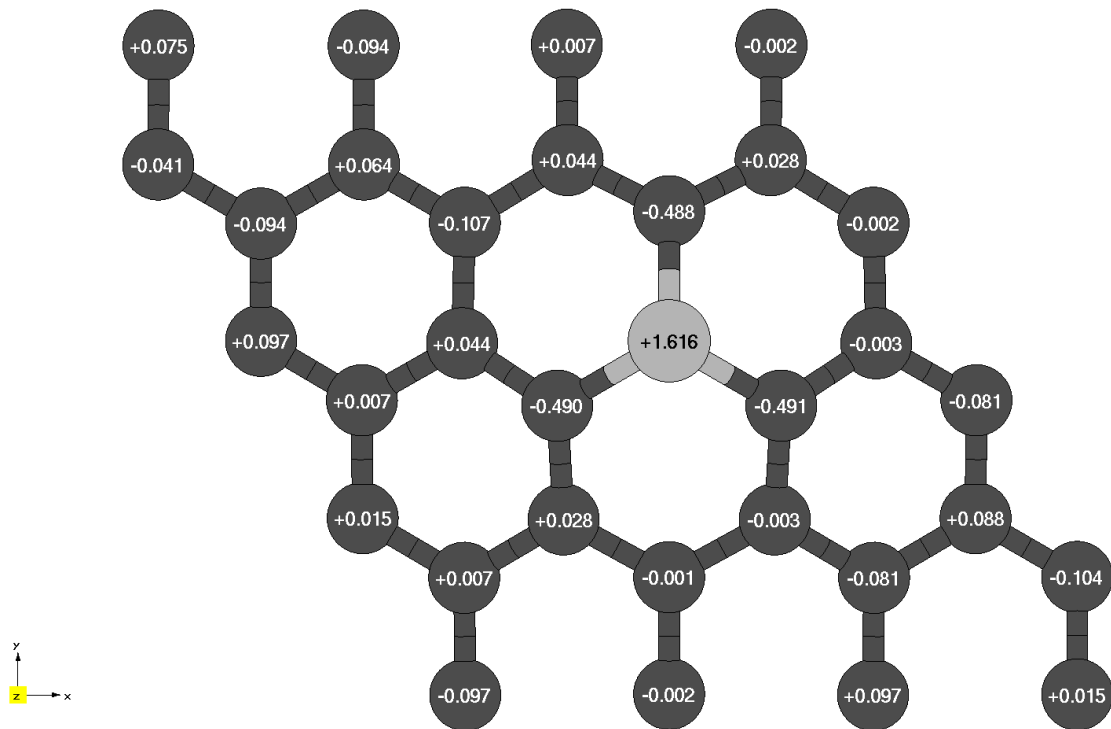

(a) top view

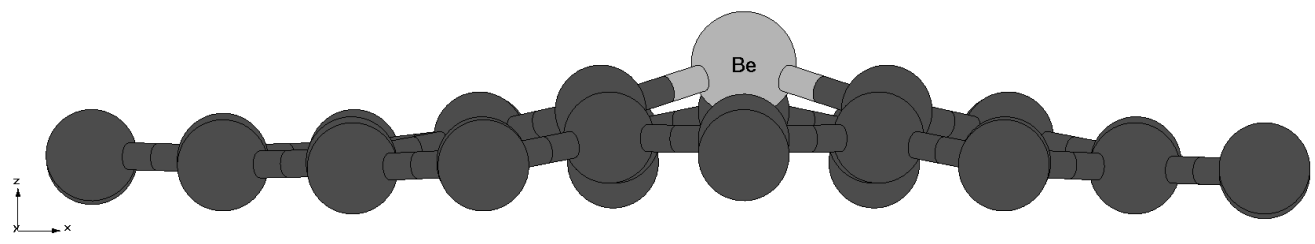

(b) side view

Fig. H2 Bader charge analysis and structure for Be-graphene at 1200 eV energy cutoff



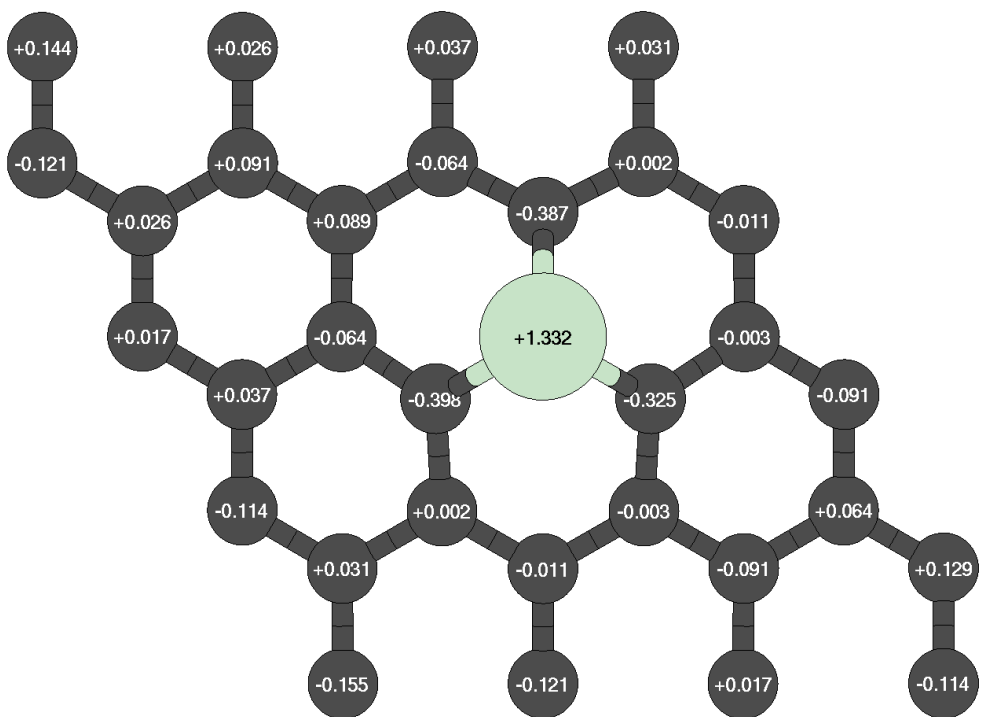

(a) top view

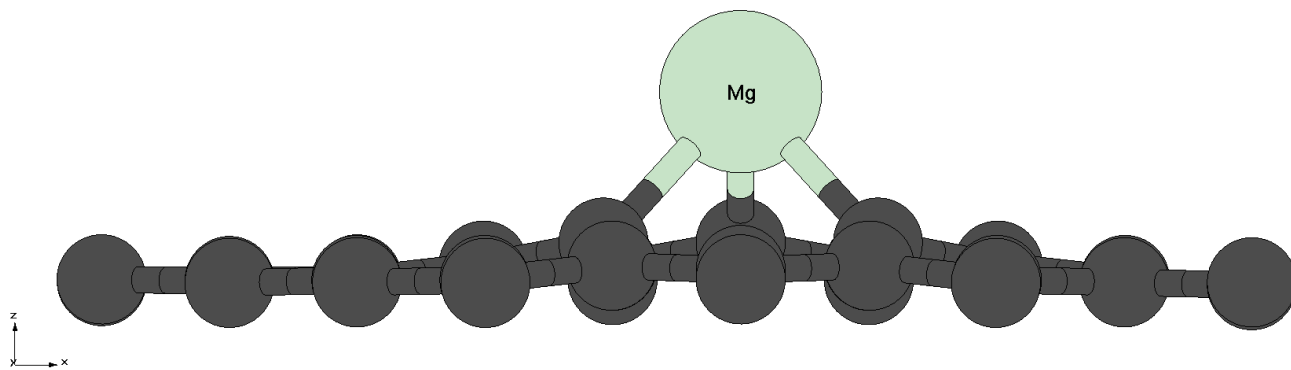

(b) side view

Fig. H3 Bader charge analysis and structure for Mg-graphene at 1200 eV energy cutoff

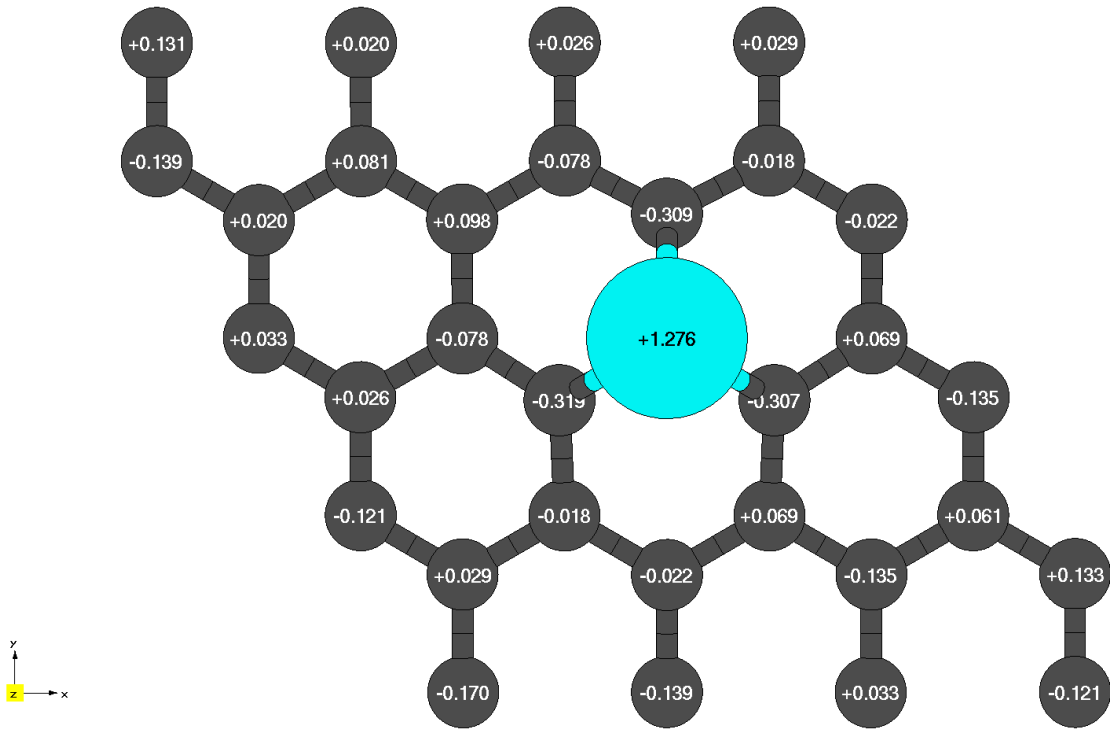

(a) top view

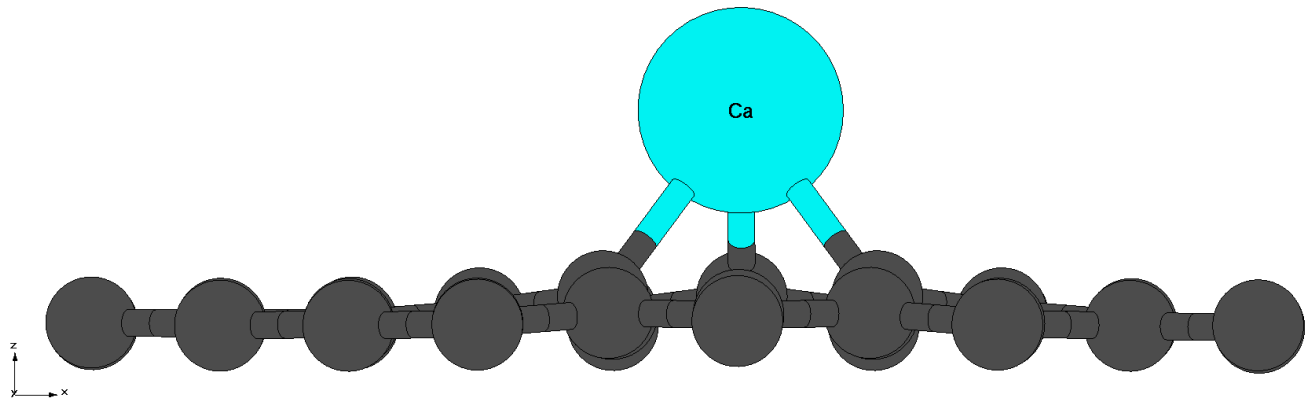

(b) side view

Fig. H4 Bader charge analysis and structure for Ca-graphene at 1200 eV energy cutoff

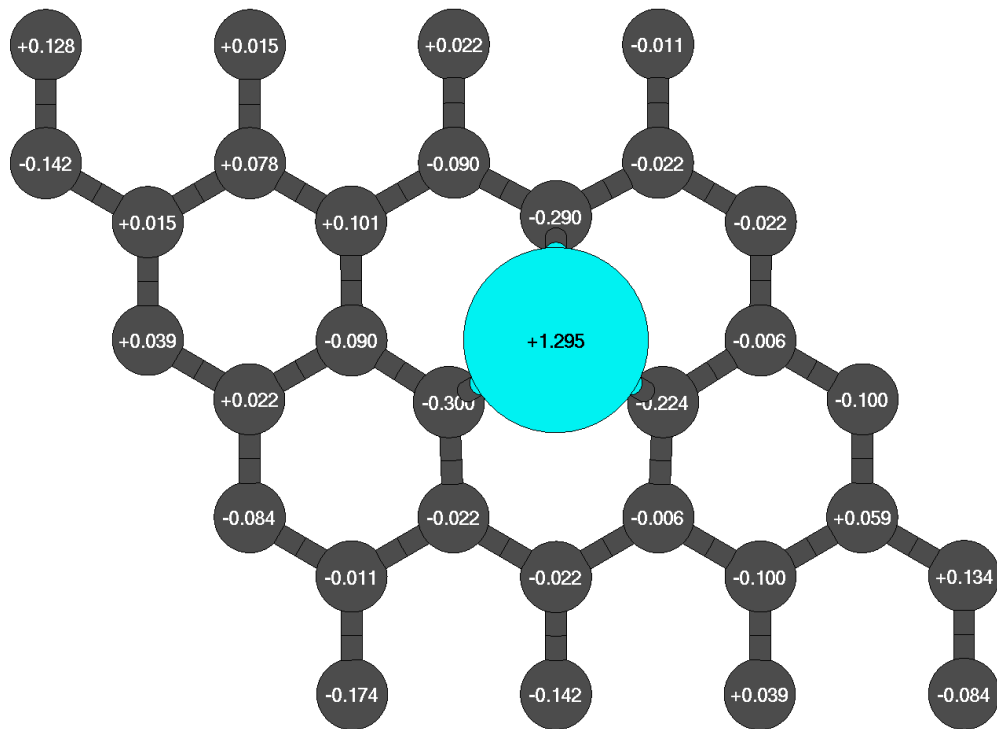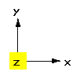

(a) top view

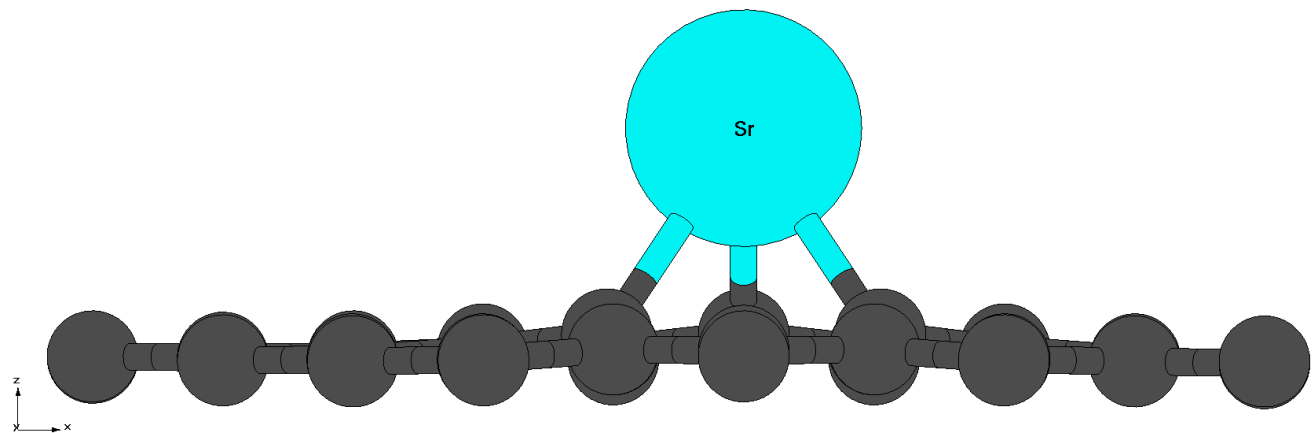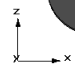

(b) side view

Fig. H5 Bader charge analysis and structure for Sr-graphene at 1200 eV energy cutoff

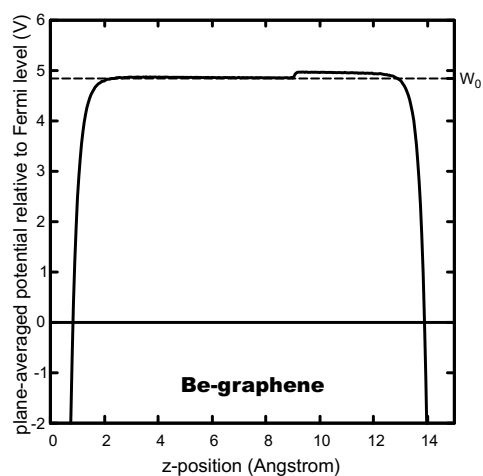

(a) Be-graphene. Workfunction ( $W_0$ ) = 4.806 eV.  
Workfunction with respect to pristine graphene = +0.541 eV

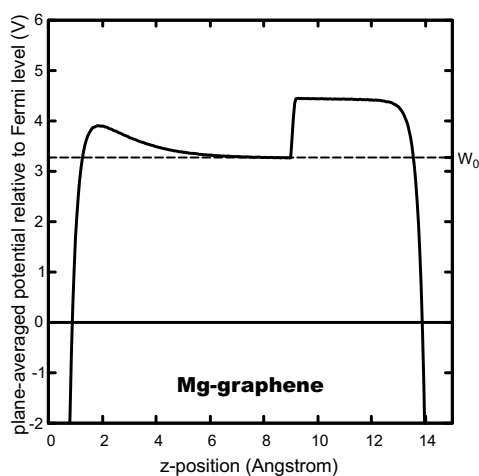

(b) Mg-graphene. Workfunction ( $W_0$ ) = 3.136 eV.  
Workfunction with respect to pristine graphene = -1.129 eV

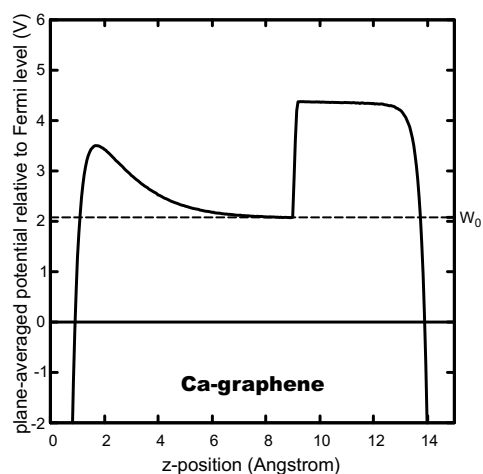

(c) Ca-graphene. Workfunction ( $W_0$ ) = 2.053 eV.  
Workfunction with respect to pristine graphene = -2.212 eV.

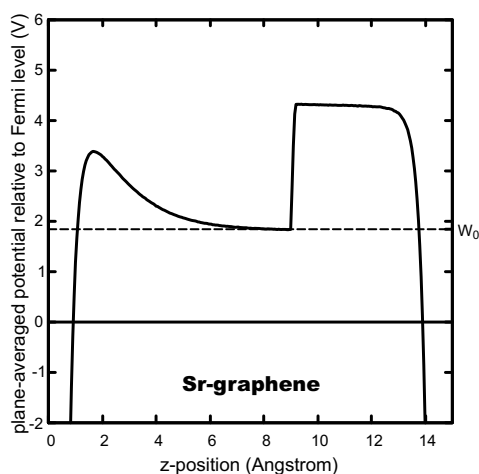

(d) Sr-graphene. Workfunction ( $W_0$ ) = 1.815 eV.  
Workfunction with respect to pristine graphene = -2.450 eV.

**Fig. H6** Plane averaged electrostatic potential plots for AE-graphenes at 1200 eV energy cutoff. Dashed line indicates the vacuum level ( $E_{vac}$ ) at the dopant-containing side of graphene.  $V = 0V$  for the plots is set at Fermi level ( $E_{Fermi}$ ) for each AE-graphene. Dopant is oriented towards the positive z-axis direction.

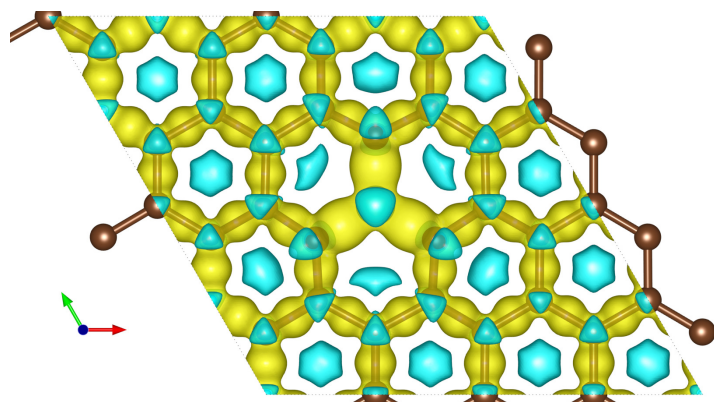

(a) Be-graphene

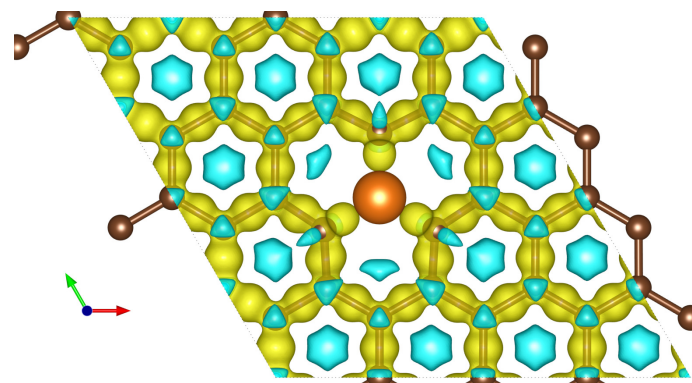

(b) Mg-graphene

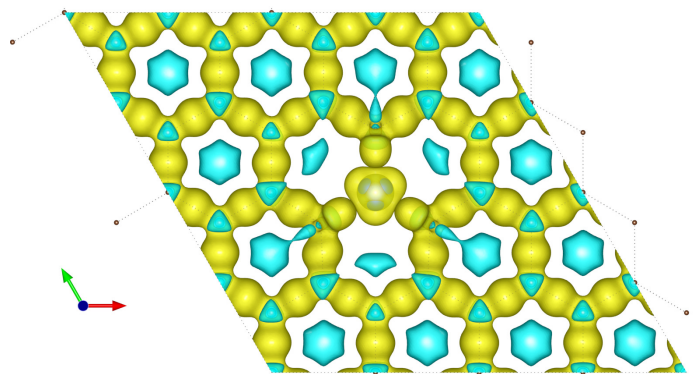

(c) Ca-graphene

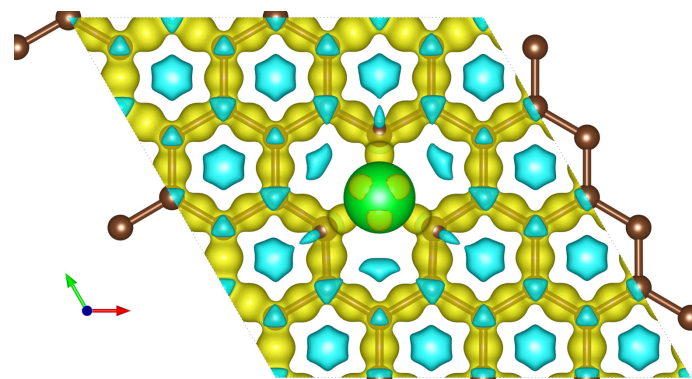

(d) Sr-graphene

**Fig. H7** Charge difference plots for alkaline-earth doped graphenes at 1200 eV energy cutoff. Yellow indicates regions which have an increase in electrons (negatively charged areas) while cyan indicates regions which have a decrease in electrons (positively charged areas). Isosurface level =  $0.013e^-/bohr^3$ . Brown atoms are carbon atoms while the differently colored atom denotes the alkaline earth dopant. Supplementary information at Fig. H8†

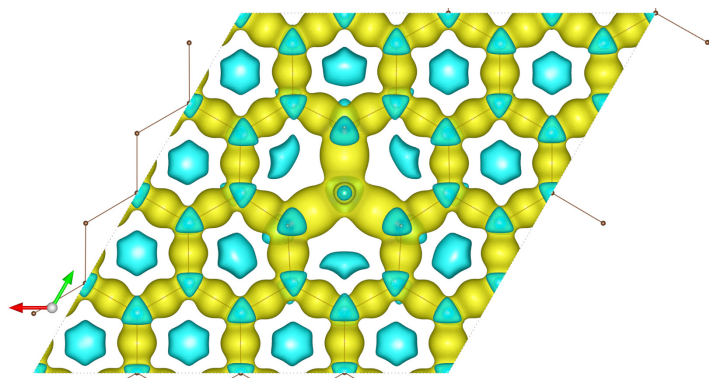

(a) Be-graphene

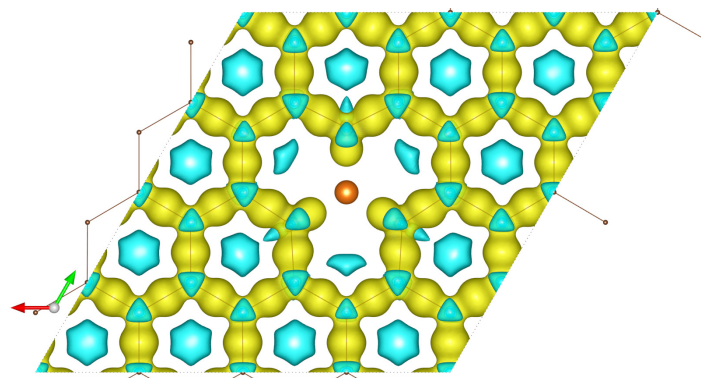

(b) Mg-graphene

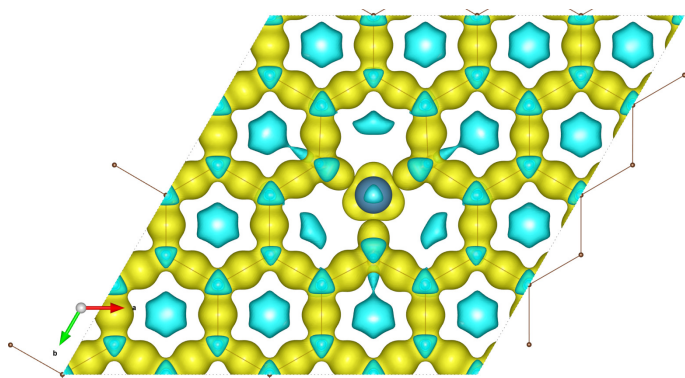

(c) Ca-graphene

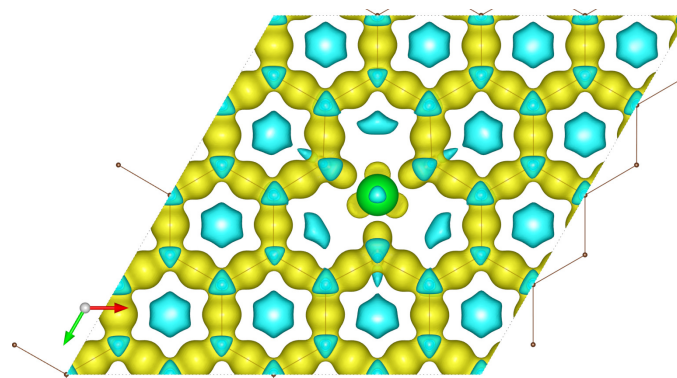

(d) Sr-graphene

**Fig. H8** Supplementary charge difference plots for alkaline-earth doped graphenes at 1200 eV energy cutoff. Bottom view is shown here to demonstrate charge-deficient areas on alkaline earth dopant. Yellow indicates regions which have an increase in electrons (negatively charged areas) while cyan indicates regions which have a decrease in electrons (positively charged areas). Isosurface level =  $0.013e^-/bohr^3$ . Brown atoms are carbon atoms while the differently colored atom denotes the alkaline earth dopant.

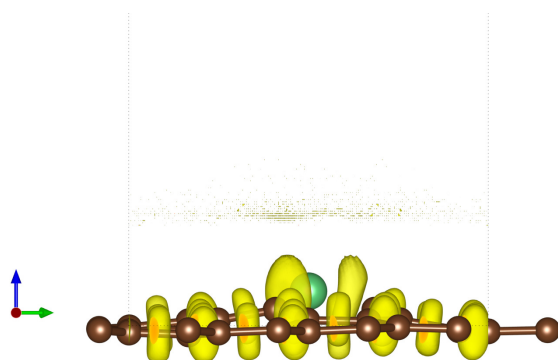

(a) Be-graphene

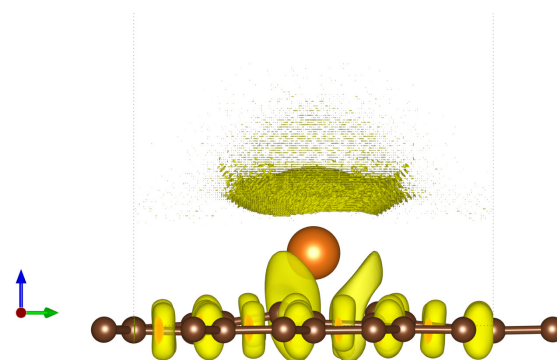

(b) Mg-graphene

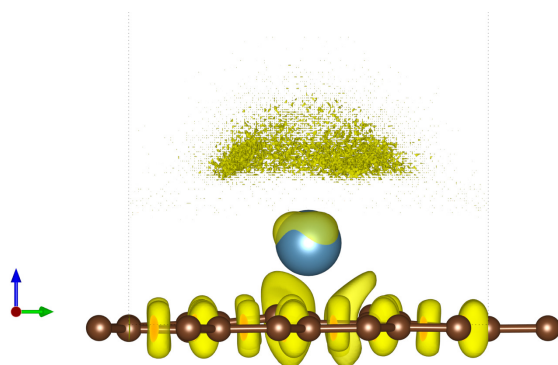

(c) Ca-graphene

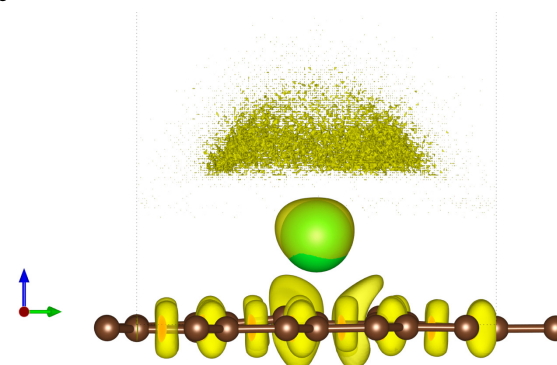

(d) Sr-graphene

**Fig. H9** Electron localization function (ELF) plots for AE-graphenes at 1200 eV energy cutoff. Brown atoms are carbon atoms while the differently colored atom denotes the alkaline earth dopant. Isosurface level = 0.8 based on recommendation by Savin et al.<sup>25</sup>. Supplementary information at Fig. H10†.



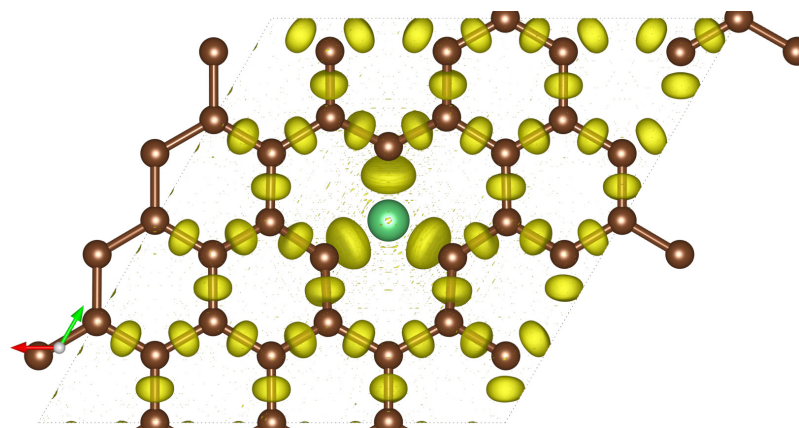

(a) Be-graphene

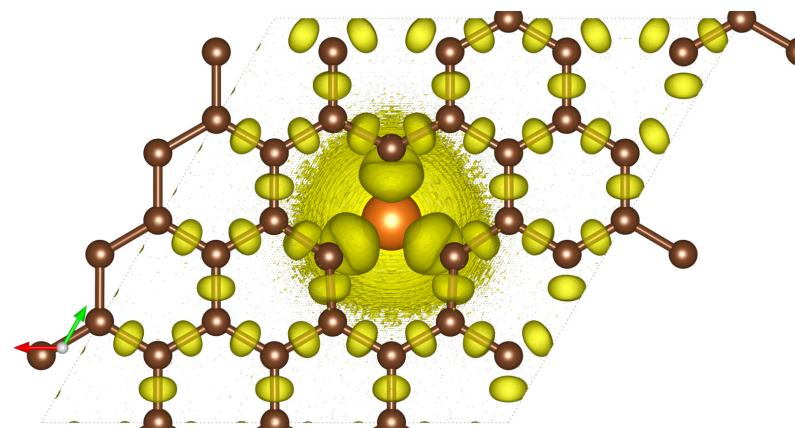

(b) Mg-graphene

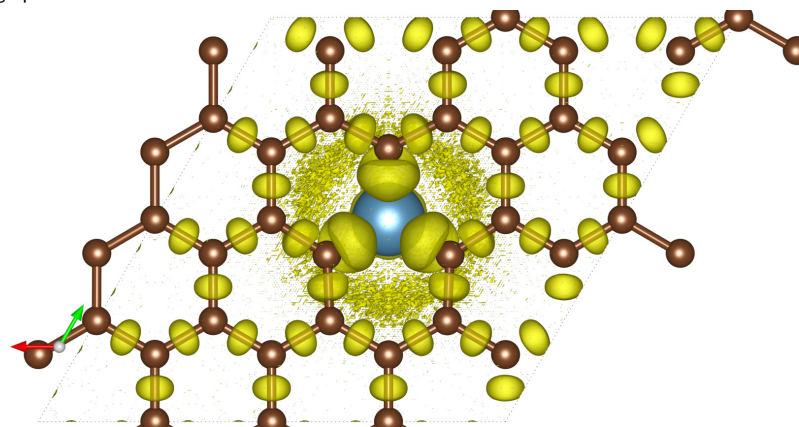

(c) Ca-graphene

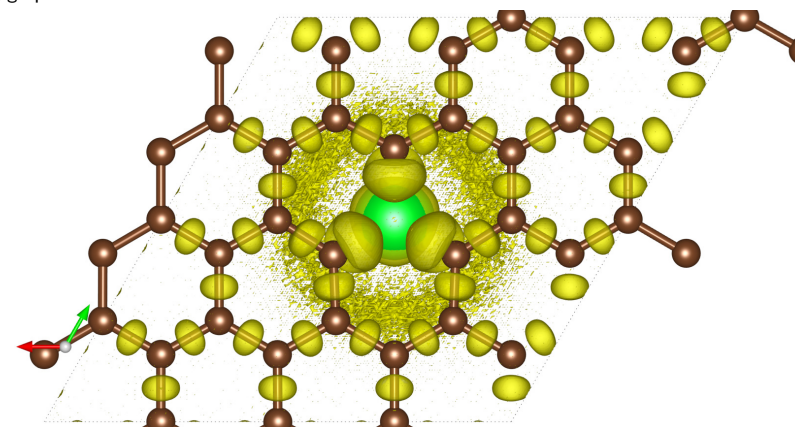

(d) Sr-graphene

**Fig. H10** Supplementary electron localization function (ELF) plots for AE-graphenes at 1200 eV energy cutoff. Bottom view is shown in these figures. Brown atoms are carbon atoms while the differently colored atom denotes the alkaline earth dopant. Isosurface level = 0.8 based on recommendation by Savin et al.<sup>25</sup>.



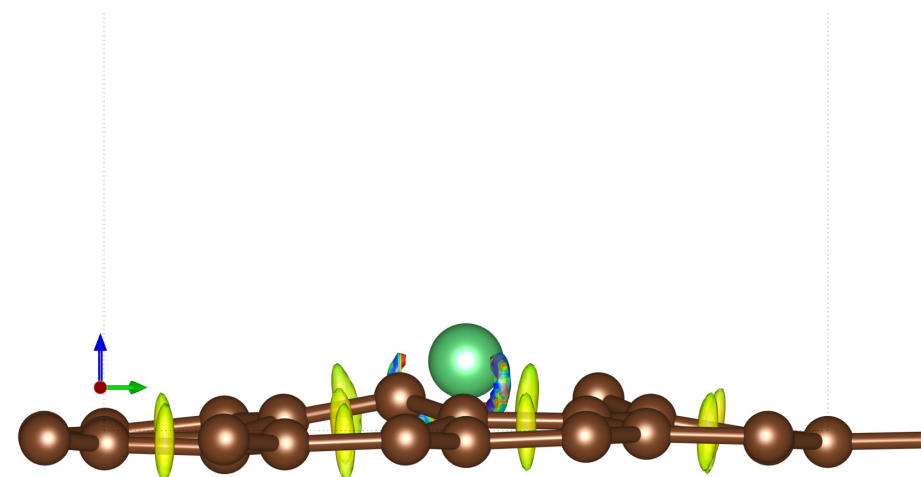

(a) Be-graphene

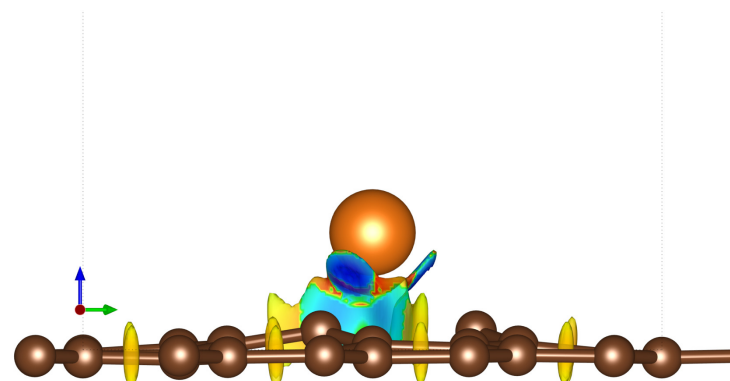

(b) Mg-graphene

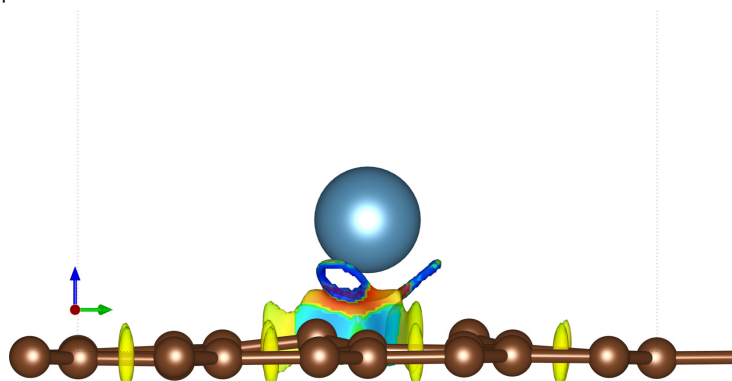

(c) Ca-graphene

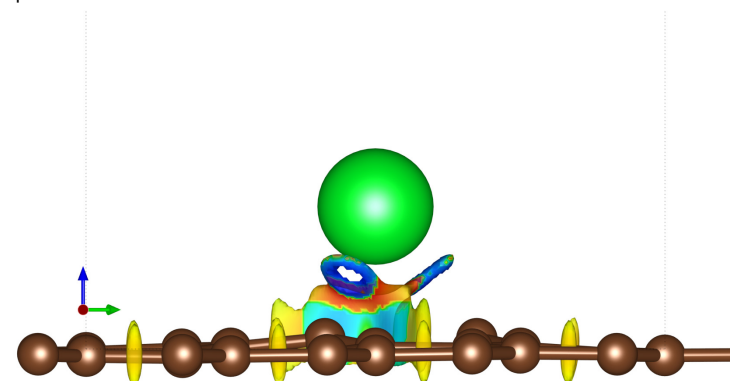

(d) Sr-graphene

**Fig. H11** Reduced density gradient (RDG) plots for AE-graphenes at 1200 eV energy cutoff. Spectrum from red to blue indicates repulsive to attractive interactions, respectively. Brown atoms are carbon atoms while the differently colored atom denotes the alkaline earth dopant. Isosurface level = 0.4. Supplementary information available at Fig. H12†.

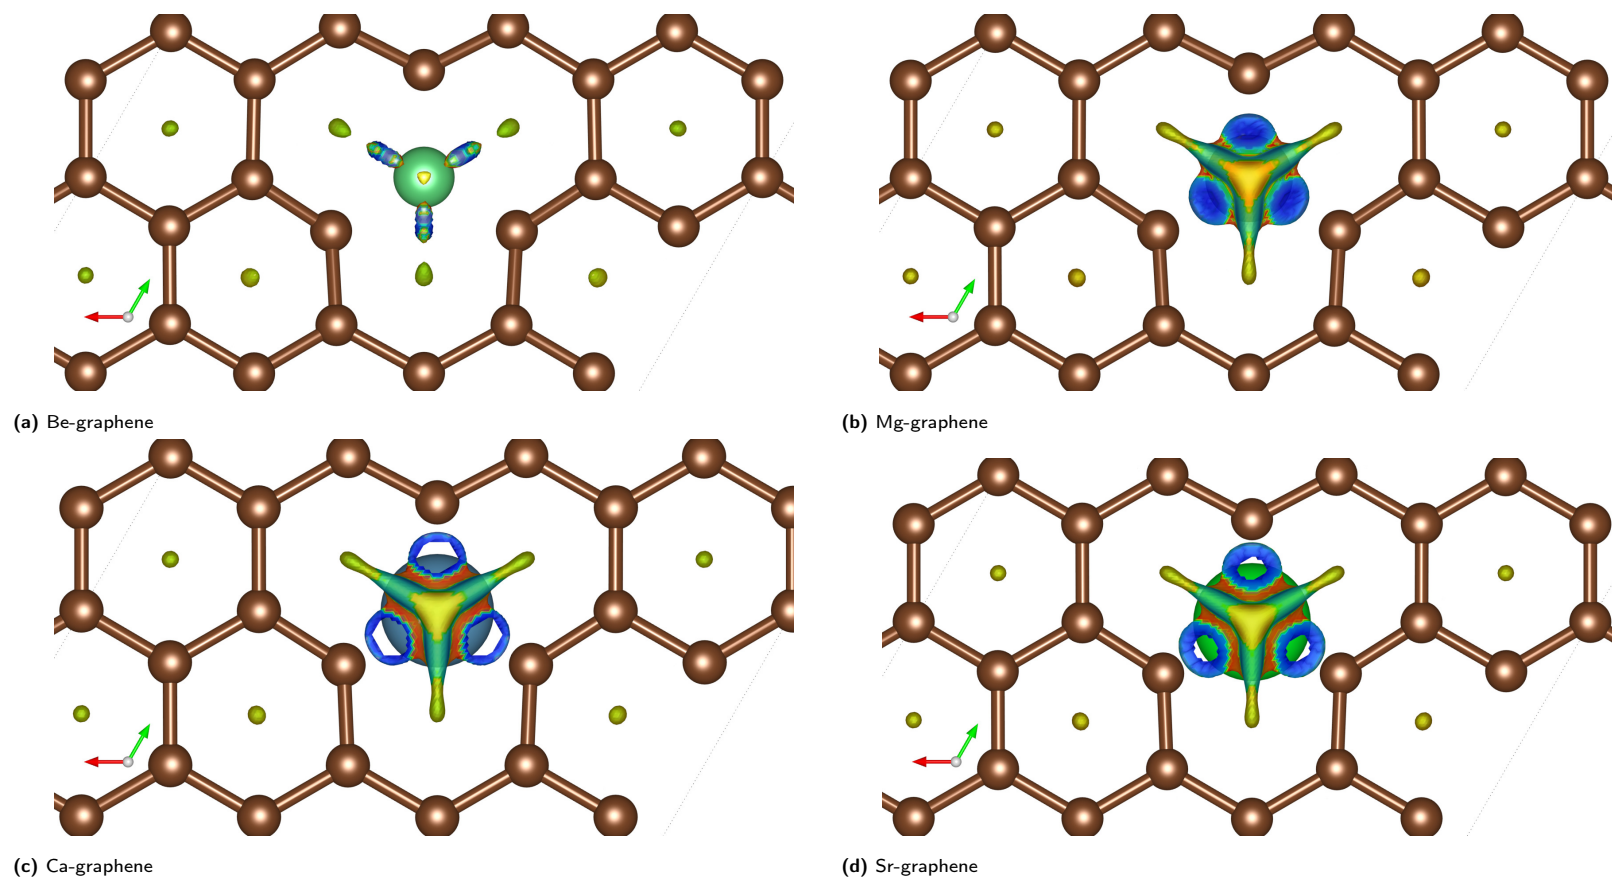

**Fig. H12** Supplementary reduced density gradient (RDG) plots for AE-graphenes at 1200 eV energy cutoff. Spectrum from red to blue indicates repulsive to attractive interactions, respectively. Bottom view shown here to highlight zones of steric strain (red) under the alkaline earth atom dopants. Brown atoms are carbon atoms while the differently colored atom denotes the alkaline earth dopant. Isosurface level = 0.4.

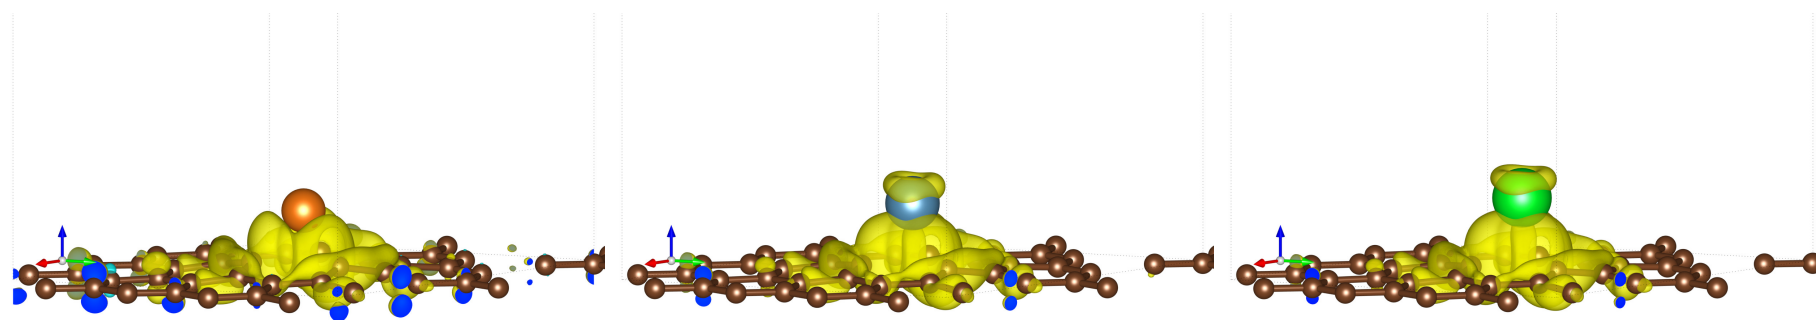

(a) Mg-graphene.

Total magnetization =  $1.95 \mu_B$ .

Absolute magnetization =  $2.03 \mu_B$ .

(b) Ca-graphene.

Total magnetization =  $1.99 \mu_B$ .

Absolute magnetization =  $2.05 \mu_B$ .

(c) Sr-graphene.

Total magnetization =  $2.00 \mu_B$ .

Absolute magnetization =  $2.07 \mu_B$ .

**Fig. H13** Spin-difference plots for AE-graphenes at 1200 eV energy cutoff. Yellow signifies majority-spin dominant regions (spin-up) while cyan signifies minority-spin dominant regions (spin-down). Isosurface level =  $0.002e^-/\text{bohr}^3$ . Total and absolute magnetization values ( $\mu_B$ ) for each AE-graphenes are also indicated. Spin-difference plots for Be-graphene not included since total and absolute magnetization for Be-graphenes is zero. Brown atoms are carbon atoms while the differently colored atom denotes the alkaline earth dopant.

**Table H2** Band structure information for AE-Graphenes. VBM and CBM levels are relative to the material's Fermi level at 1200 eV energy cutoff. VBM-CBM locations are indicated on the respective band structure plots (Fig. H16a,H18a and H20a).

| Majority spin |          |          |                  |                  |                  |
|---------------|----------|----------|------------------|------------------|------------------|
| Dopant        | VBM (eV) | CBM (eV) | VBM-CBM gap (eV) | gap type         | VBM-CBM location |
| Be            | -0.165   | 0.129    | 0.294            | indirect, p-type | $\Gamma$ -M      |
| Mg            | 0.144    | 0.192    | 0.048            | direct, p-type   | K-K              |
| Ca            | 0.038    | 0.358    | 0.320            | direct, p-type   | K-K              |
| Sr            | -0.027   | 0.280    | 0.253            | direct, p-type   | K-K              |
| Minority spin |          |          |                  |                  |                  |
| Dopant        | VBM (eV) | CBM (eV) | VBM-CBM gap (eV) | gap type         | VBM-CBM location |
| Be            | -0.165   | 0.129    | 0.294            | indirect, p-type | $\Gamma$ -M      |
| Mg            | -0.303   | 0.238    | 0.541            | indirect, n-type | K-M              |
| Ca            | -0.375   | 0.196    | 0.571            | indirect, n-type | K- $\Lambda$     |
| Sr            | -0.240   | 0.359    | 0.599            | indirect, n-type | K- $\Lambda$     |

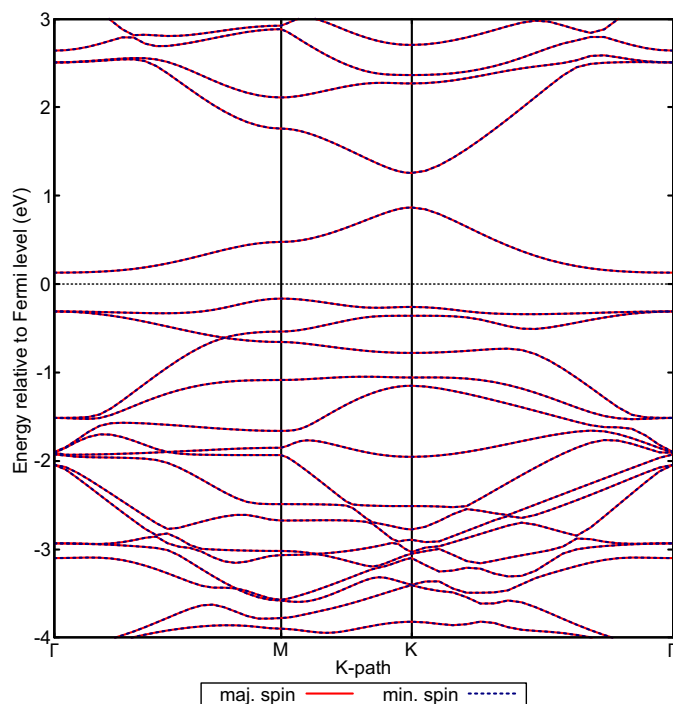

(a) Band structure

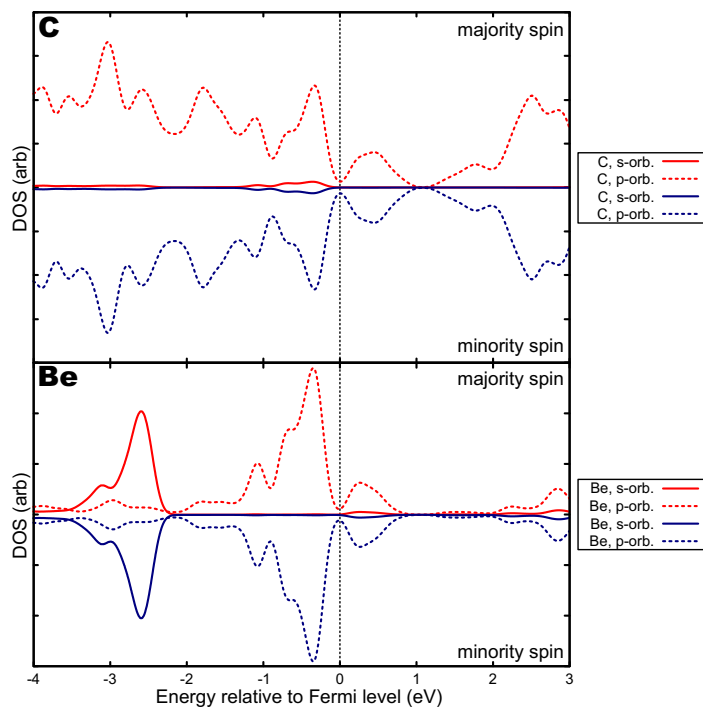

(b) projected DOS (pDOS) for Be-graphene

**Fig. H14** Electronic properties and orbital hybridization for Be-graphene at 1200 eV energy cutoff. Red indicates majority spin (spin up) states and blue indicates minority spin (spin down) states. Supplementary information for electronic properties at Fig. H15 †.

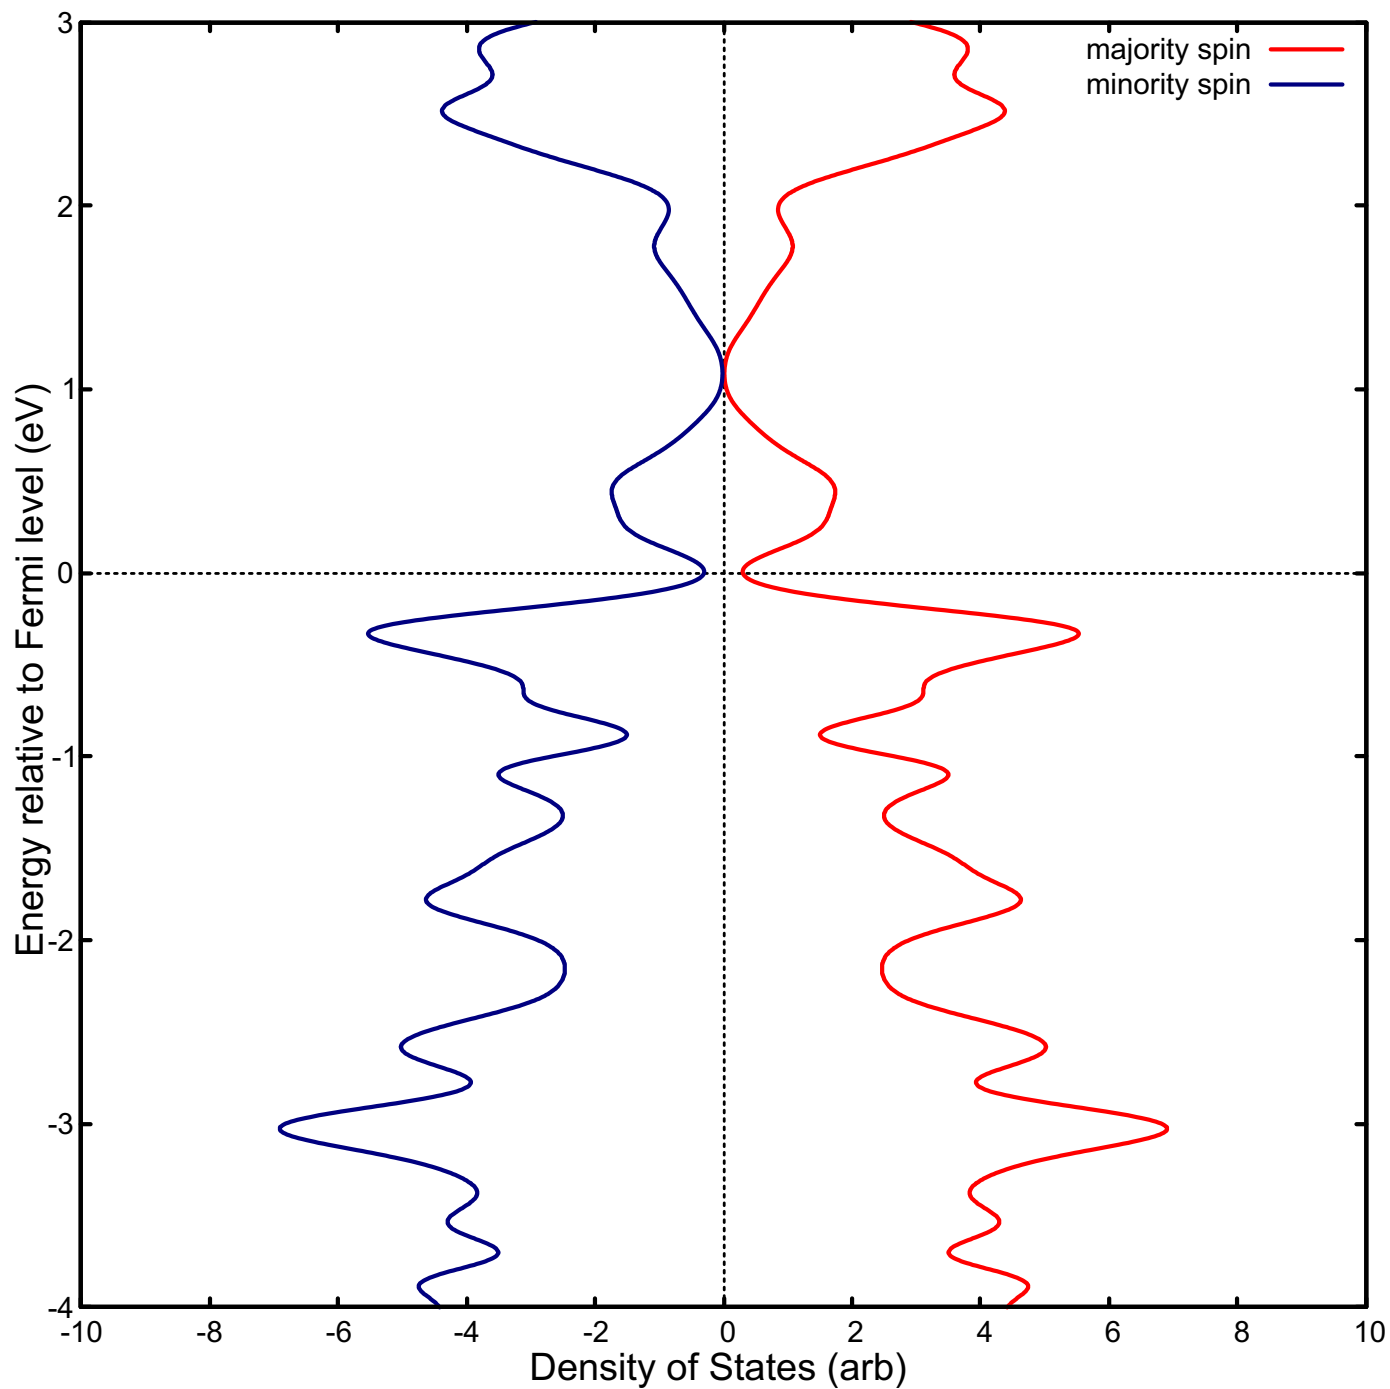

(a) Density of states (DOS)

**Fig. H15** DOS for Be-graphene at 1200 eV energy cutoff. For the DOS, red indicates majority spin (spin up) states and blue indicates minority spin (spin down) states.

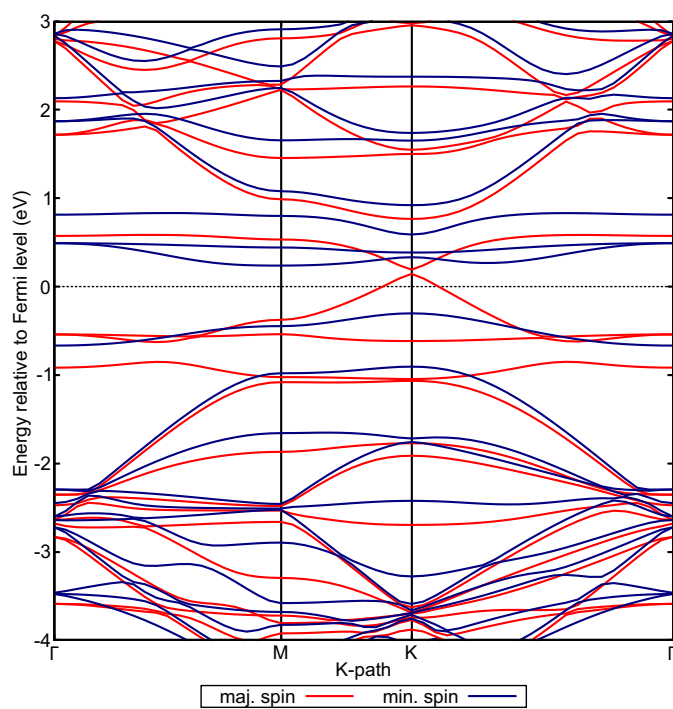

(a) Band structure

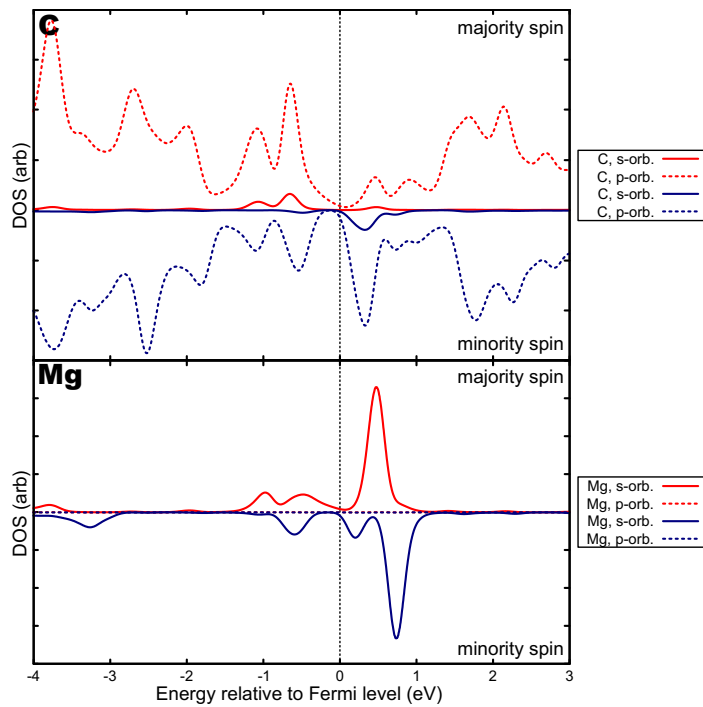

(b) projected DOS (pDOS) for Mg-graphene

**Fig. H16** Electronic properties and orbital hybridization for Mg-graphene at 1200 eV energy cutoff. Red indicates majority spin (spin-up) states and blue indicates minority spin (spin down) states. Supplementary information for electronic properties at Fig. H17†.

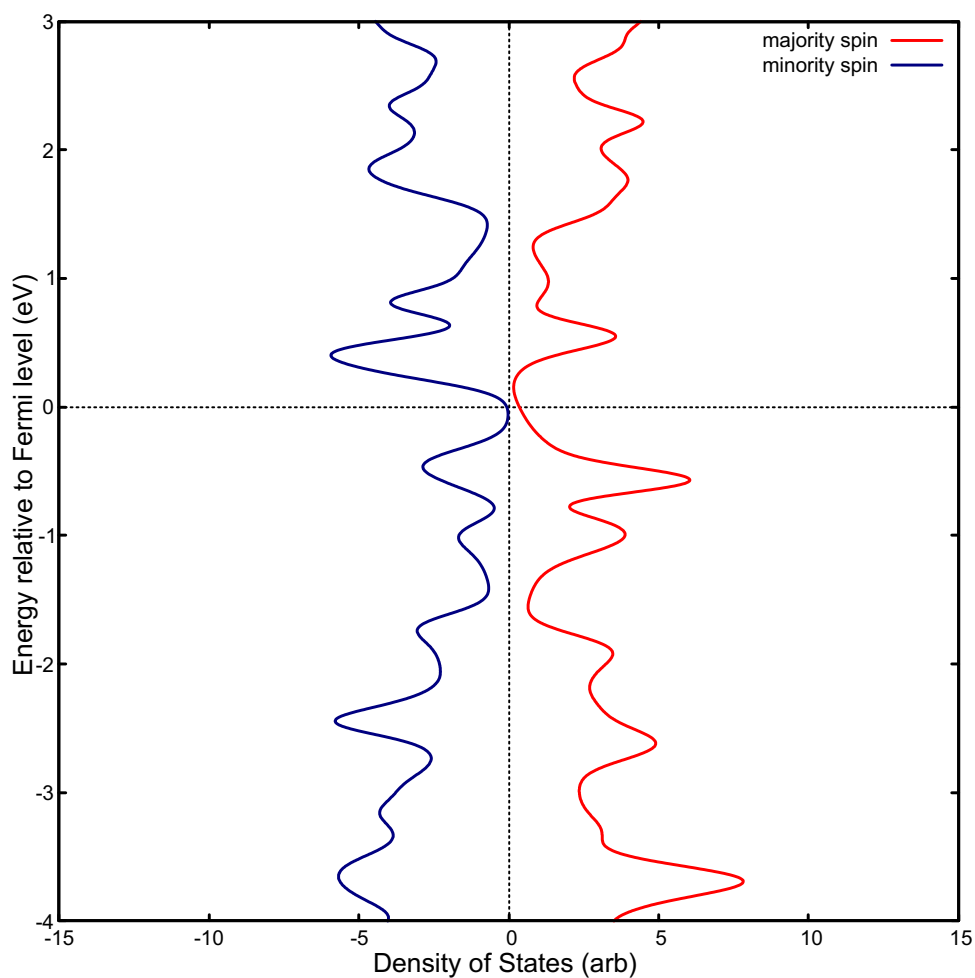

(a) Density of states (DOS)

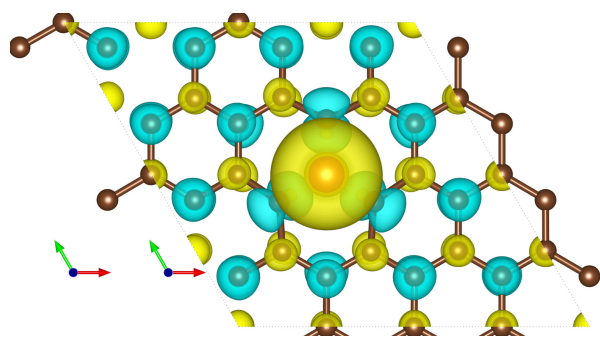

(b) majority spin VBM and CBM partial electron density

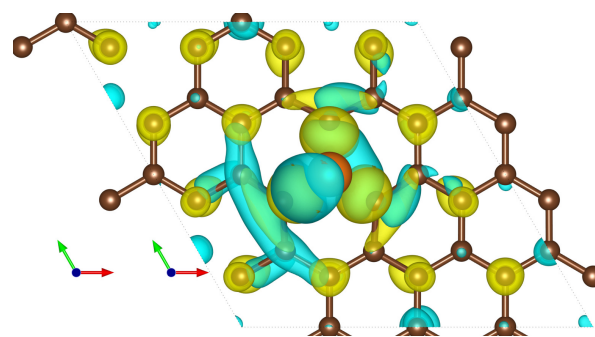

(c) minority spin VBM and CBM partial electron density

**Fig. H17** DOS and VBM and CBM partial charge densities for Mg-graphene at 1200 eV energy cutoff. For the DOS, red indicates majority spin (spin-up) states and blue indicates minority spin (spin down) states. For the VBM and CBM partial charge densities, yellow indicates regions contributing to the VBM, while cyan indicates regions contributing to the CBM. Brown atoms are carbon atoms while the differently colored atom denotes the alkaline earth dopant. Isosurface level for VBM and CBM partial charge densities =  $0.0015e^-/bohr^3$



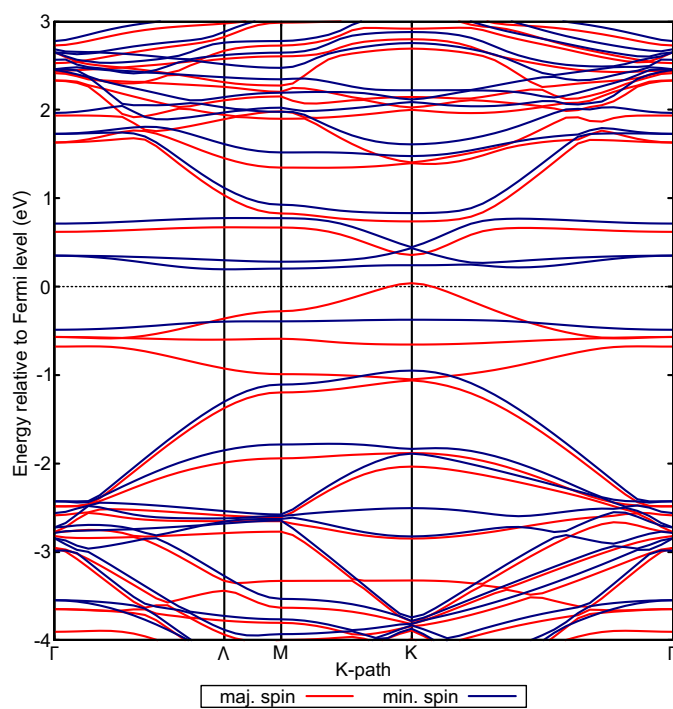

(a) Band structure

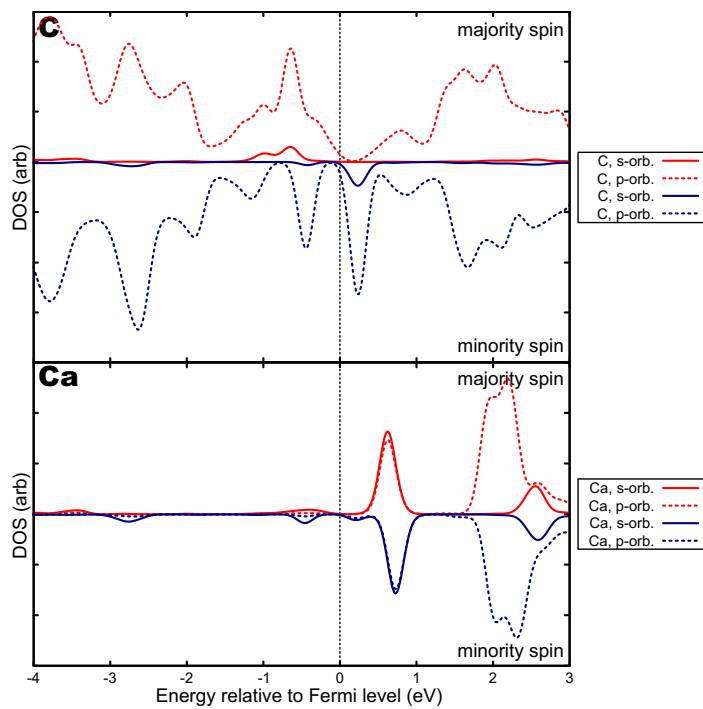

(b) projected DOS (pDOS) for Ca-graphene

**Fig. H18** Electronic properties and orbital hybridization for Ca-graphene at 1200 eV energy cutoff. Red indicates majority spin (spin up) states and blue indicates minority spin (spin down) states. Supplementary information for electronic properties at Fig. H19†.

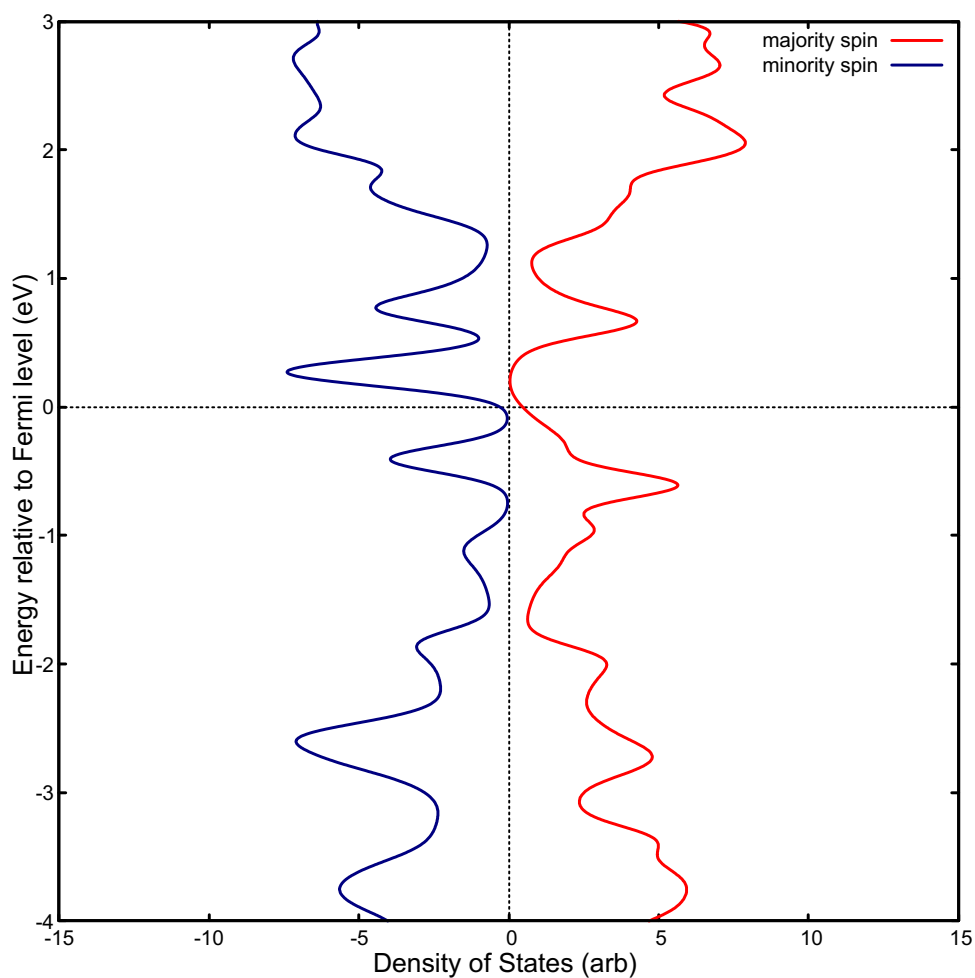

(a) Density of states (DOS)

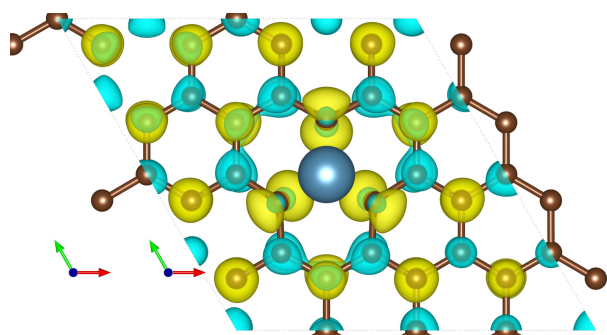

(b) majority spin VBM and CBM  
partial electron density

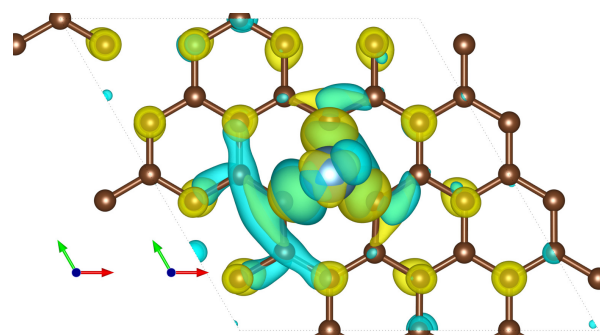

(c) minority spin VBM and CBM  
partial electron density

**Fig. H19** DOS and VBM and CBM partial charge densities for Ca-graphene at 1200 eV energy cutoff. For the DOS, red indicates majority spin (spin-up) states and blue indicates minority spin (spin-down) states. For the VBM and CBM partial charge densities, yellow indicates regions contributing to the VBM, while cyan indicates regions contributing to the CBM. Brown atoms are carbon atoms while the differently colored atom denotes the alkaline earth dopant. Isosurface level for VBM and CBM partial charge densities =  $0.0015e^-/\text{bohr}^3$

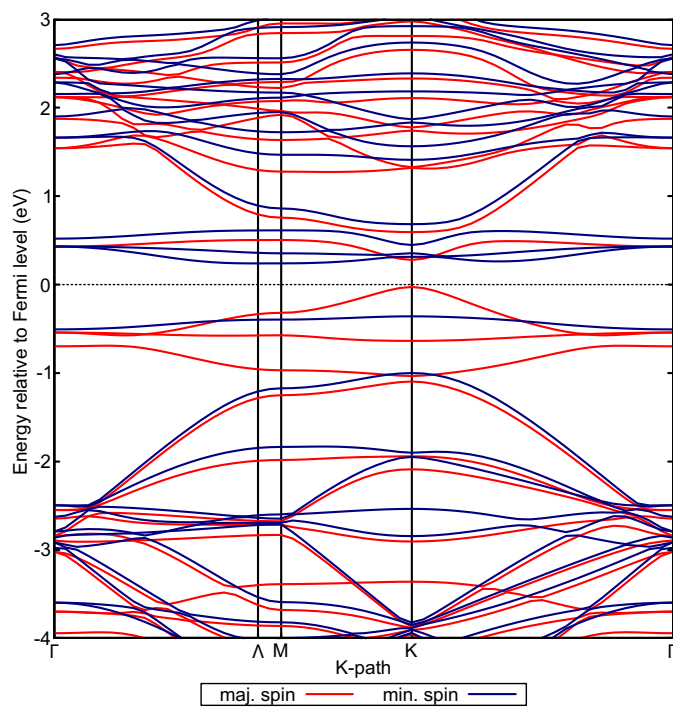

(a) Band structure

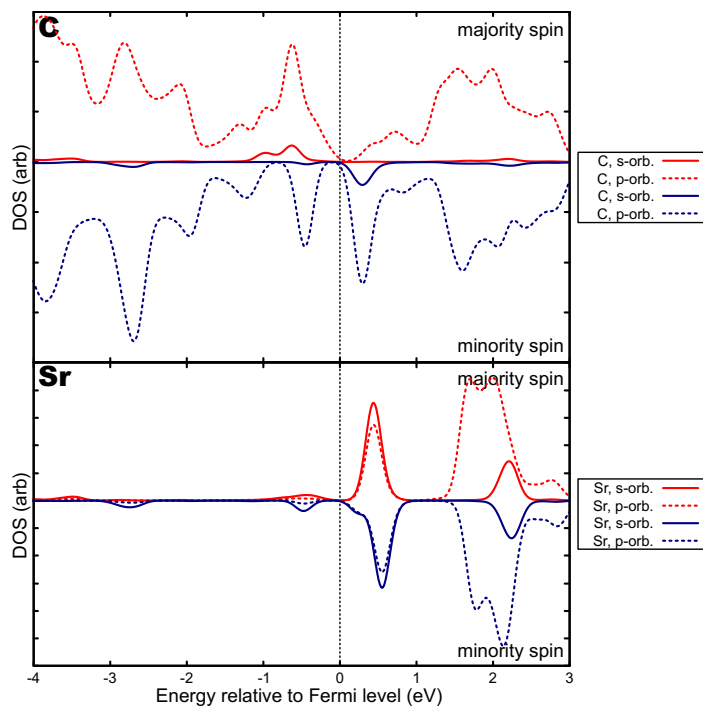

(b) projected DOS (pDOS) for Sr-graphene

**Fig. H20** Electronic properties and orbital hybridization for Sr-graphene at 1200 eV energy cutoff. Red indicates majority spin (spin up) states and blue indicates minority spin (spin down) states. Supplementary information for electronic properties at Fig. H21†.

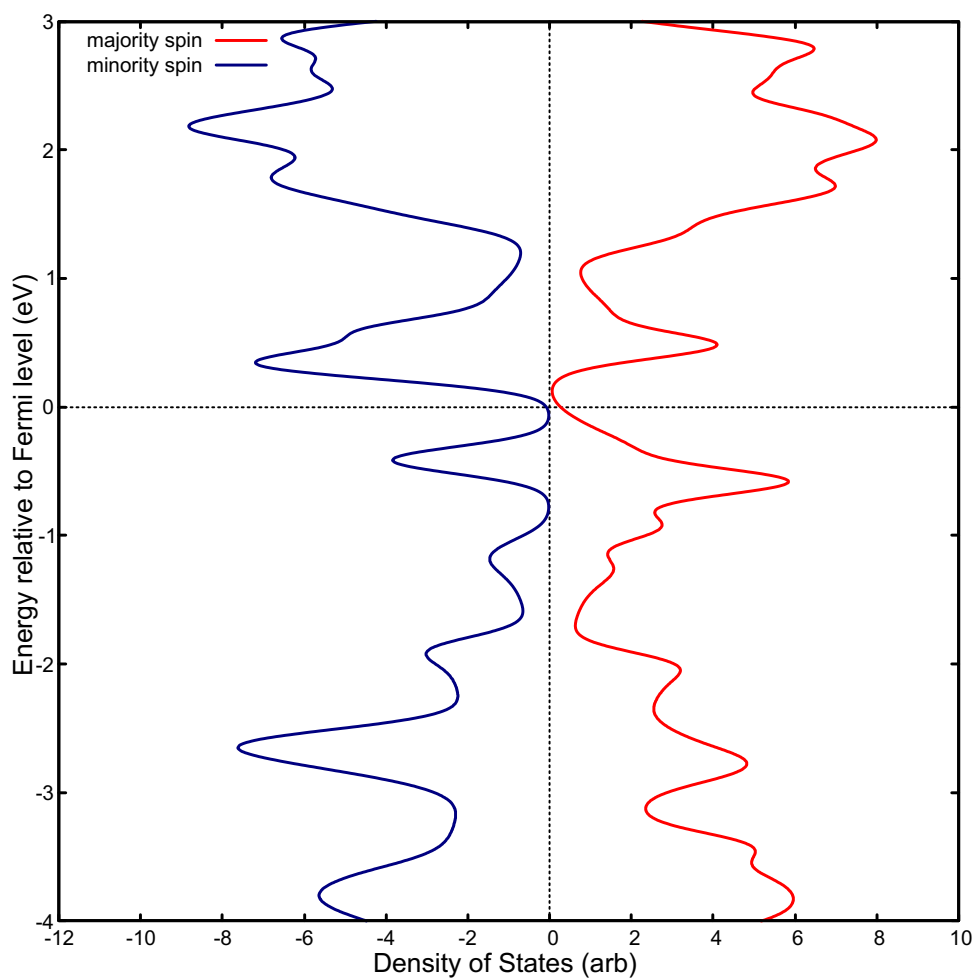

(a) Density of states (DOS)

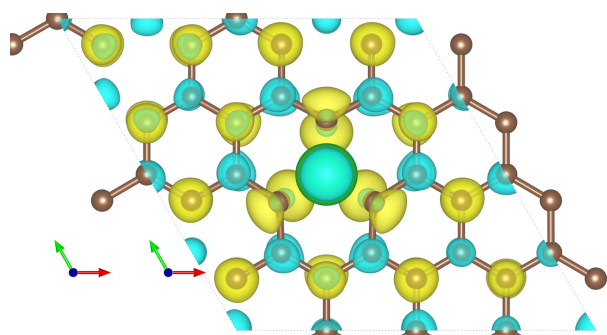

(b) majority spin VBM and CBM  
partial electron density

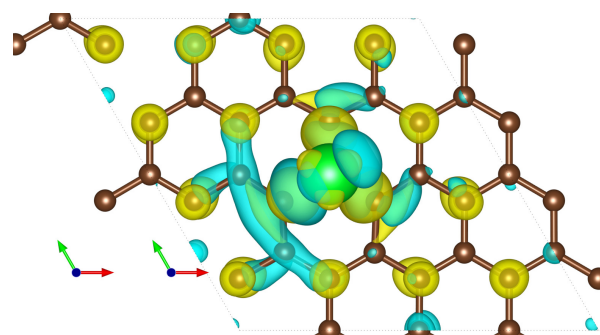

(c) minority spin VBM and CBM  
partial electron density

**Fig. H21** DOS and VBM and CBM partial charge densities for Sr-graphene at 1200 eV energy cutoff. For the DOS, red indicates majority spin (spin-up) states and blue indicates minority spin (spin-down) states. For the VBM and CBM partial charge densities, yellow indicates regions contributing to the VBM, while cyan indicates regions contributing to the CBM. Brown atoms are carbon atoms while the differently colored atom denotes the alkaline earth dopant. Isosurface level for VBM and CBM partial charge densities =  $0.0015e^-/\text{bohr}^3$

## Notes and references

- 1 F. Lopez-Urias, M. Terrones and H. Terrones, *Carbon*, 2015, **84**, 317–326.
- 2 A. C. F. Serraon, A. A. B. Padama, J. A. D. del Rosario and J. D. Ocon, *ECS Transactions*, 2017, **77**, 629–636.
- 3 H. Luo, L. Zhang, S. Xu, M. Shi, W. Wu and K. Zhang, *Applied Surface Science*, 2020, 147542.
- 4 S. Ullah, A. Hussain, W. Syed, M. A. Saqlain, I. Ahmad, O. Leenaerts and A. Karim, *RSC Advances*, 2015, **5**, 55762–55773.
- 5 C. Klain, S. Linde, R. Shikler and G. Sarusi, *Carbon*, 2020, **157**, 255–261.
- 6 K. C. Kwon, K. S. Choi and S. Y. Kim, *Advanced Functional Materials*, 2012, **22**, 4724–4731.
- 7 R. Martínez-Orozco, H. Rosu, S.-W. Lee and V. Rodríguez-González, *Journal of Hazardous Materials*, 2013, **263**, 52–60.
- 8 E. Rut'kov, E. Afanas'eva and N. Gall, *Diamond and Related Materials*, 2020, **101**, 107576.
- 9 T. Yoon, Q. Wu, D.-J. Yun, S. H. Kim and Y. J. Song, *Scientific Reports*, 2020, **10**, 9870.
- 10 R. Yan, Q. Zhang, W. Li, I. Calizo, T. Shen, C. A. Richter, A. R. Hight-Walker, X. Liang, A. Seabaugh, D. Jena, H. Grace Xing, D. J. Gundlach and N. V. Nguyen, *Applied Physics Letters*, 2012, **101**, 022105.
- 11 T. Takahashi, H. Tokailin and T. Sagawa, *Physical Review B*, 1985, **32**, 8317–8324.
- 12 Y. Shi, K. K. Kim, A. Reina, M. Hofmann, L.-J. Li and J. Kong, *ACS Nano*, 2010, **4**, 2689–2694.
- 13 C. Oshima and A. Nagashima, *Journal of Physics: Condensed Matter*, 1997, **9**, 1–20.
- 14 J.-Y. Syu, Y.-M. Chen, K.-X. Xu, S.-M. He, W.-C. Hung, C.-L. Chang and C.-Y. Su, *RSC Advances*, 2016, **6**, 32746–32756.
- 15 B. Shan and K. Cho, *Physical Review Letters*, 2005, **94**, 236602.
- 16 T. Hu and I. C. Gerber, *The Journal of Physical Chemistry C*, 2013, **117**, 2411–2420.
- 17 K. Nishidate, N. Yoshimoto, P. Chantngarm, H. Saito and M. Hasegawa, *Molecular Physics*, 2016, **114**, 2993–2998.
- 18 G. Bae, H. Jung, N. Park, J. Park, S. Hong and W. Park, *Applied Physics Letters*, 2012, **100**, 183102.
- 19 W. Hu, Z. Li and J. Yang, *The Journal of Chemical Physics*, 2013, **138**, 124706.
- 20 N. Yang, D. Yang, L. Chen, D. Liu, M. Cai and X. Fan, *Nanoscale Research Letters*, 2017, **12**, 642.
- 21 G. Giovannetti, P. A. Khomyakov, G. Brocks, V. M. Karpan, J. van den Brink and P. J. Kelly, *Physical Review Letters*, 2008, **101**, 026803.
- 22 S.-M. Choi, S.-H. Jhi and Y.-W. Son, *Physical Review B*, 2010, **81**, 081407.
- 23 O. Leenaerts, B. Partoens, F. M. Peeters, A. Volodin and C. Van Haesendonck, *Journal of Physics: Condensed Matter*, 2017, **29**, 035003.
- 24 H. Hibino, H. Kageshima, M. Kotsugi, F. Maeda, F.-Z. Guo and Y. Watanabe, *Physical Review B*, 2009, **79**, 125437.
- 25 A. Savin, R. Nesper, S. Wengert and T. F. Fässler, *Angewandte Chemie International Edition in English*, 1997, **36**, 1808–1832.
